# Supplementary material
Source: PubMed Central journal article supplement (PMC3784296)
Supplement: peds.2013-1451_peds.2013-1451SupplementaryData.pdf [file peds.2013-1451_peds.2013-1451SupplementaryData.pdf]

## Supplemental Information

Search strategy: MEDLINE (in PubMed)

- |                                     |                                      |                                                                                     |
|-------------------------------------|--------------------------------------|-------------------------------------------------------------------------------------|
| 01. patient compliance [mh]         | 11. emergency service, hospital [mh] | 22. 9 OR 10 OR 11 OR 12 OR 13 OR 14<br>OR 15 OR 16 OR 17 OR 18 OR 19 OR<br>20 OR 21 |
| 02. medication adherence [mh]       | 12. ambulatory care [mh]             | 23. chronic disease [mh]                                                            |
| 03. adherence [pt]                  | 13. health care utilization [pt]     | 24. chronic illness [pt]                                                            |
| 04. non-adherence [pt]              | 14. outpatient visit [pt]            | 25. chronic care [pt]                                                               |
| 05. self-management [pt]            | 15. emergency department [pt]        | 26. chronic [pt]                                                                    |
| 06. compliance [pt]                 | 16. hospitalization [pt]             | 27. diabetes [pt]                                                                   |
| 07. treatment concordance [pt]      | 17. health care cost [pt]            | 28. asthma [pt]                                                                     |
| 08. 1 OR 2 OR 3 OR 4 OR 5 OR 6 OR 7 | 18. service utilization [pt]         | 29. HIV [pt]                                                                        |
| 09. health care costs [mh]          | 19. service use [pt]                 | 30. 23 OR 24 OR 25 OR 26 OR 27 OR 28<br>OR 29                                       |
| 10. hospitalization [mh]            | 20. health care use [pt]             | 31. 8 AND 22 AND 3                                                                  |
|                                     | 21. cost [pt]                        |                                                                                     |
